# Supplementary material for: Control of location and distribution of heteroatoms substituted isomorphously in framework of zeolites and zeotype materials
Source: Royal Society of Chemistry journal article supplement (doi:10.1039/d1ce00912e), 2021-01-01
Supplement: d1ce00912e1.pdf [file d1ce00912e1.pdf]

There is no supplementary information available for this article.
